# Supplementary material for: Self-repairing metal–organic hybrid complexes for reinforcing immobilized chloroperoxidase reusability
Source: Royal Society of Chemistry journal article supplement (doi:10.1039/c6cc10319g), 2017-01-01
Supplement: c6cc10319g1.pdf [file c6cc10319g1.pdf]

# Electronic Supplementary Information

## Self-repairing metal-organic hybrid complexes for reinforcing immobilized chloroperoxidase reusability

Yan Liu,<sup>a</sup> Yumei Zhang,<sup>b</sup> Xuejian Li,<sup>a</sup> Qipeng Yuan,<sup>a,b</sup> and Hao Liang<sup>a,b†</sup>

---

<sup>a.</sup> *State key Laboratory of Chemical Resource Engineering, Beijing University of Chemical Technology, Beijing, P.R. China.*

<sup>b.</sup> *Beijing Advanced Innovation Center for Soft Matter Science and Engineering, Beijing University of Chemical Technology, Beijing, P.R. China.*

† Corresponding author: lianghao@mail.buct.edu.cn

### Materials

Chloroperoxidase (CPO; EC 1.11.1.10; from *Caldariomyces fumago*: 4699 units/mL) was purchased from Sigma-Aldrich, USA. CPO was used without further purification, and the stock solution is a 20-fold dilution. Bovine serum albumin (BSA) was purchased from Biotopped, China. Modafinil and 2-(diphenylmethylthio) acetamide was purchased from Energy Chemical, China. Hydroquinone was purchased from Tianjin Fuchen Chemical Reagents Factory. The enzyme substrate 2,2'-Azinobis (3-ethylbenzothiazoline-6-sulfonicacid Ammonium salt) (ABTS<sup>2-</sup>) was obtained from aladdin, China. Sodium alginate (SA) was purchased from Sinopharm Chemical Reagent, China. Tert-butyl hydroperoxide (TBHP) was purchased from XIYA Reagent, China., Trifluoroacetic acid (TFA), acetonitrile, methanol, isopropanol and cyclohexane used for analytical

HPLC were chromatographic grade and obtained from Honeywell Burdick & Jackson.  $\text{CaCl}_2$ ,  $\text{Na}_2\text{HPO}_4$ ,  $\text{NaH}_2\text{PO}_4$ ,  $\text{HCl}$ ,  $\text{H}_2\text{O}_2$  and other reagents and solvents were obtained from Beijing Chemical Works and were of analytical grade.

### **Preparation of metal-organic hybrid complexes**

BSA water solution (1 mg/mL, 100  $\mu\text{L}$ ) or CPO (12 U) and PBS buffer (10 mM, pH 7.4, 900  $\mu\text{L}$ ) were mixed together, followed by adding aqueous  $\text{CaCl}_2$  solution (180 mM, 100  $\mu\text{L}$ ). After incubating for 24 h, the mixture was centrifuged at 7378 g for 5 min to obtain the complexes. The encapsulation efficiency was determined by the Bradford's method.<sup>[S2]</sup>

### **Preparation of SA coated metal-organic hybrid complexes**

The precipitation of  $\text{BSA}@\text{Ca}_3(\text{PO}_4)_2$  or  $\text{CPO}@\text{Ca}_3(\text{PO}_4)_2$  was re-dispersed into a PBS buffer (pH 6.5, 20 mM, 600  $\mu\text{L}$ ), then adding 400  $\mu\text{L}$  of SA solution (20 mg/mL). The mixture was incubated at room temperature for the formation of self-repairing metal-organic hybrid composites. After 12 h, the solution was centrifuged at 10625 g for 5 min to obtain SA coated composites.

### **Characterization**

Transmission electron microscopy (TEM) was performed on a Hitachi H-800 transmission electron microscope. The sample was prepared by pipetting a drop of the aqueous solution of the samples onto a 230 mesh holey carbon copper grid and drying on a filter paper. Scanning

electron microscope (SEM) was performed on a Hitachi S-4700 Scanning electron microscope. A drop of the suspension of the prepared samples was added to a cover glass pieces for SEM and dried at room temperature. Confocal laser scanning microscopy (CLSM) was performed on a LEICA TCS SP8 confocal laser scanning microscopy. Isothiocyanate (FITC)-labeled BSA was prepared according to the method reported by Wu and the co-authors<sup>[S1]</sup>.

Powder X-ray diffraction (XRD) patterns were recorded using a D8 Advance X-Ray diffractometer with a Cu K $\alpha$  anode ( $\lambda = 0.15406$  nm) at 40 kV and 40 mA. Fourier transform infrared spectroscopy (FTIR) spectra of BSA, Ca<sub>3</sub>(PO<sub>4</sub>)<sub>2</sub>, BSA@Ca<sub>3</sub>(PO<sub>4</sub>)<sub>2</sub> and SA-coated BSA@Ca<sub>3</sub>(PO<sub>4</sub>)<sub>2</sub> composites were performed on a Nicolet 8700/Continuum XL Imaging Microscopy with measuring wavelength range from 4000 to 400 cm<sup>-1</sup>. Each sample was lyophilized before XRD measurement.

### **Activity assay of free and immobilized CPO**

The activity of chloroperoxidase was established by following the decrease of absorbance at 414 nm due to the conversion of ABTS<sup>2-</sup> to ABTS<sup>•-</sup>. The activity assay was carried out at room temperature in 10 mM pH 2.75 phosphoric acid buffer solution (10mM, 400  $\mu$ L, prepared by phosphoric acid and NaH<sub>2</sub>PO<sub>4</sub>), 0.25 mM ABTS<sup>2-</sup>, 4.4 mM H<sub>2</sub>O<sub>2</sub>, and 0.5 U CPO. Immobilized CPO (containing about 0.5 U of enzyme) was introduced in the same assay medium used for determining the activity of

free enzyme. The absorbance at 414 nm was performed on a Shimadzu UV-2450 (Kyoto, Japan) UV-visible Spectrophotometer using quartz cuvettes.

### **The kinetic parameter of free and immobilized CPO**

To determine the enzymatic kinetic parameter of free CPO, CPO@Ca<sub>3</sub>(PO<sub>4</sub>)<sub>2</sub> and SA-coated CPO@Ca<sub>3</sub>(PO<sub>4</sub>)<sub>2</sub> (containing about 0.5 U of enzyme) was added to 400 µL of pH 2.75 phosphoric acid buffer solution (10 mM) containing 0.25 mM ABTS<sup>2-</sup> and various concentrations of H<sub>2</sub>O<sub>2</sub> (9-90 µM). The activity of both free and immobilized CPO was calculated by the initial reaction rate from the slope of changes in absorbance versus time.

The kinetic parameters of K<sub>m</sub> and K<sub>cat</sub> were calculated using the Lineweaver-Bruke plot:

$$\frac{1}{\theta} = \frac{K_m}{V_{max}[S]} + \frac{1}{V_{max}}$$

### **Enzyme stability test**

Thermal stability was carried out by measuring the residual activity of the enzyme exposed to various temperatures (30°C-80°C) for 30 min. Storage stability was investigated by measuring their remaining activities after being stored at room temperature for a certain period. The activity assay of free and immobilized CPO was measured by the aforementioned method.

### **Reusability of metal-organic hybrid complexes**

The recycling use of enzyme catalysts was performed by ABTS method. The composites (including 0.5 U CPO) were mixed with pH 2.75 phosphoric acid buffer solution (10 mM, 400  $\mu$ L) containing H<sub>2</sub>O<sub>2</sub> (4.4 mM) and ABTS<sup>2-</sup> (0.25 mM). After 10 minutes, the mixture was centrifuged at 7378 g for 5 min. The supernatant was separated and the absorbance was determined at 414 nm on a UV/Vis spectrophotometer. The precipitates of enzyme composites were used for the next batch of the enzymatic reaction.

## **Synthesis of Modafinil**

Asymmetric sulfoxidation of 2-(diphenylmethylthio) acetamide to (R)-modafinil was chosen as the target reaction to investigate the catalysis and the recycling of the hybrid composites. The 2 mL of 10 mM phosphoric acid buffer solution (pH 4.5) containing 0.2 mM 2-(diphenylmethylthio) acetamide and the enzyme containing 6 U/mL CPO were mixed. Finally, added 12 mM TBHP to start reaction at room temperature. The supernatant was separated by centrifugation at 7378 g, 5 min for monitoring the product formation.

Reverse phase HPLC was used to quantitatively analyze the product formation with a SHIMADZU 15C serial HPLC apparatus equipped with reversed-phase C-18 column (250  $\times$  4.6 mm, 5  $\mu$ m, Diamodsil<sup>TM</sup>) and UV detector at 225 nm. The solvent system consists of 30% acetonitrile and 0.2% TFA in water. The column temperature was maintained at 30°C. The

flow rate was 0.5 mL/min, and 20  $\mu$ L portions were injected into the column. The retention time for modafinil was 7.3 min, for 2-(diphenylmethylthio) acetamide was 8.6 min. The epimeric purity was determined by chiral HPLC with AD-H column (250  $\times$  4.6 mm, 5  $\mu$ m, Daicel). All the aqueous samples were extracted by ethyl acetate and collected the organic phase. The eluent was methanol with a flow rate of 0.5 mL/min. The retention time was 8.7 min for (R)-modafinil, 10.6 min for (S)-modafinil. The procedure was repeated to determine the reusability of enzyme catalysts.

### **The degradation of hydroquinone**

A solution of 0.45mM hydroquinone and the hybrid composites containing 0.7 U CPO in 183  $\mu$ L of pH 3 phosphoric acid buffer solution (10 mM) was mixed at room temperature. Finally, 4  $\mu$ L H<sub>2</sub>O<sub>2</sub> (88.3 mM) was added to start reaction. After 20 min, the mixture was separated by centrifugation at 7378 g, 5 min. The sedimentation for continue to use in the next time and the supernatant for monitoring the degradation spectrometrically at 290 nm.

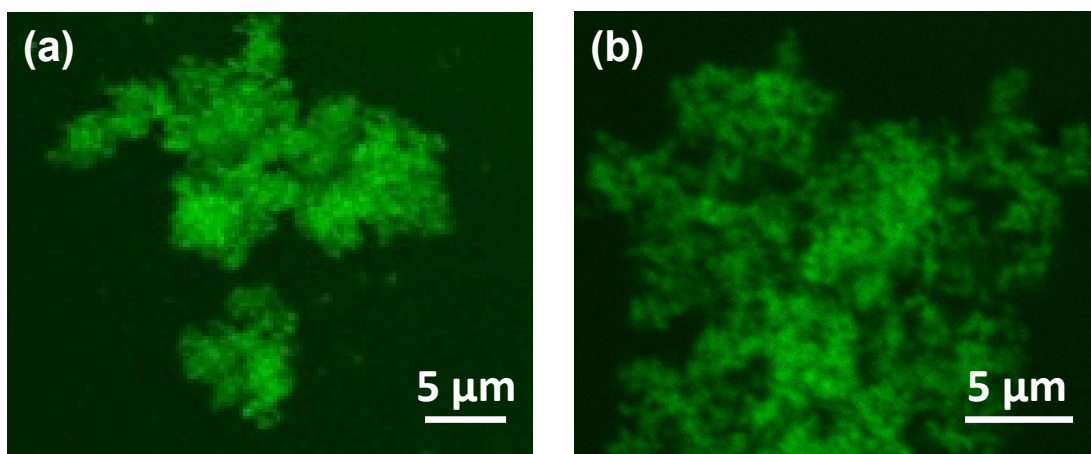

Fig.S1 CLSM micrograph of (a)BSA@Ca<sub>3</sub>(PO<sub>4</sub>)<sub>2</sub> and (b)SA-coated BSA@Ca<sub>3</sub>(PO<sub>4</sub>)<sub>2</sub>.

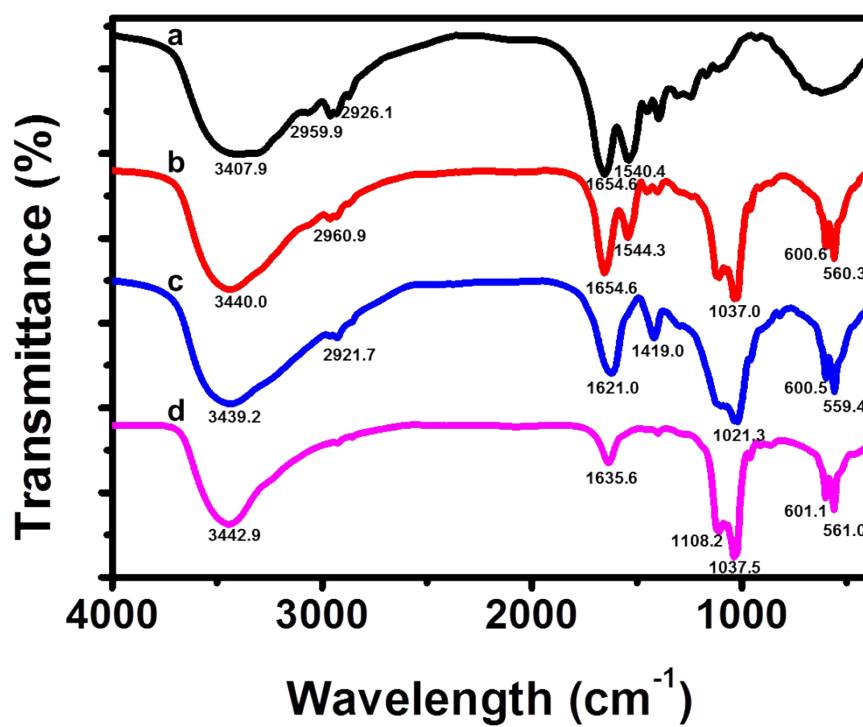

Fig. S2 The FTIR spectra of BSA (Curve (a)), BSA@Ca<sub>3</sub>(PO<sub>4</sub>)<sub>2</sub> (Curve (b)), SA-coated BSA@Ca<sub>3</sub>(PO<sub>4</sub>)<sub>2</sub> (Curve (c)), and Ca<sub>3</sub>(PO<sub>4</sub>)<sub>2</sub> (Curve (d)).

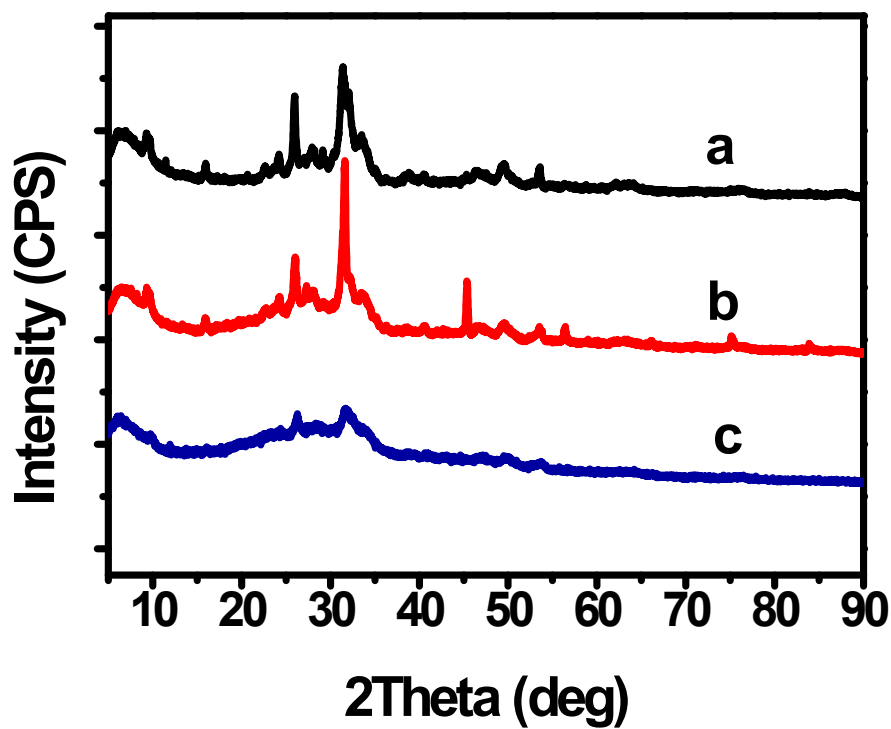

Fig. S3 X-ray diffraction (XRD) spectra of  $\text{Ca}_3(\text{PO}_4)_2$  (Curve (a)),  $\text{BSA}@\text{Ca}_3(\text{PO}_4)_2$  (Curve (b)): SA-coated  $\text{BSA}@\text{Ca}_3(\text{PO}_4)_2$  (Curve (c)).

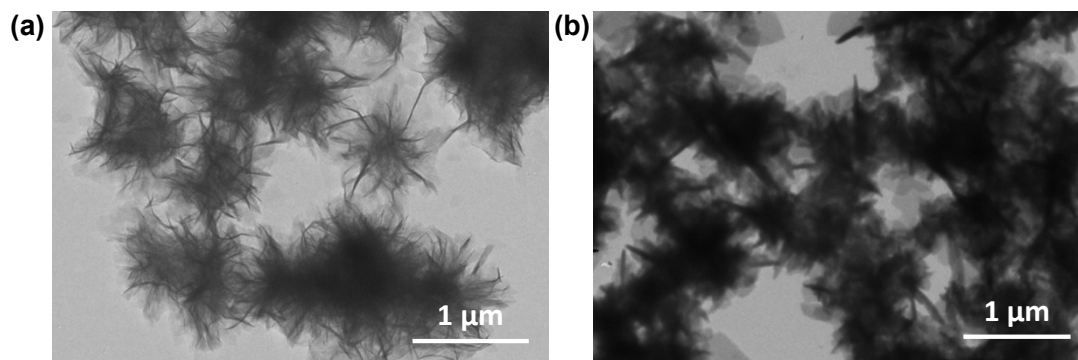

Fig. S4 TEM photos of  $\text{CPO}@\text{Ca}_3(\text{PO}_4)_2$  hybrid composites with or without SA coating.

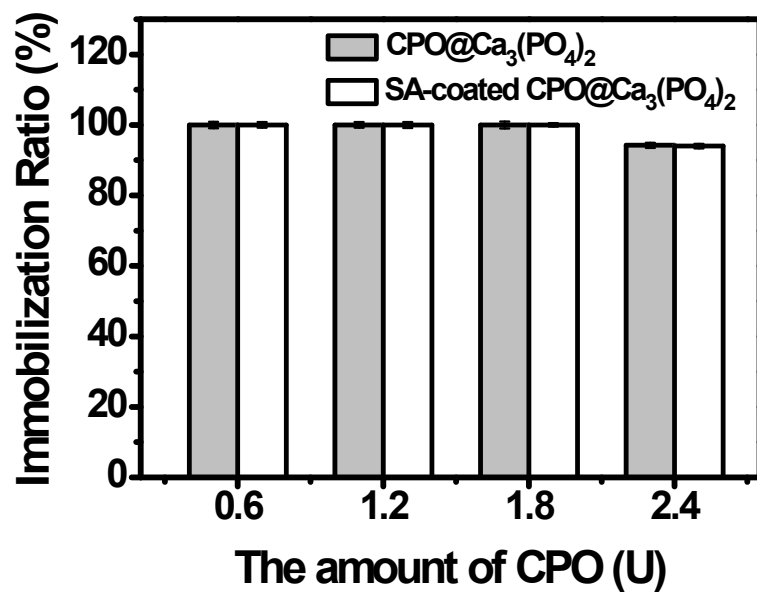

Fig. S5 The immobilization capacity of CPO@Ca<sub>3</sub>(PO<sub>4</sub>)<sub>2</sub> and SA-coated CPO@Ca<sub>3</sub>(PO<sub>4</sub>)<sub>2</sub> hybrid composites. (Experiment conditions: PBS buffer (10mM, pH 7.4, 180  $\mu$ L), aqueous CaCl<sub>2</sub> solution (180 mM, 20  $\mu$ L), containing different amount of CPO.)

Table S1. Kinetic parameters for free CPO and SA-coated CPO@Ca<sub>3</sub>(PO<sub>4</sub>)<sub>2</sub>

|                                                               | $K_m(\mu\text{M})$ | $K_{cat}(\text{s}^{-1})$ |
|---------------------------------------------------------------|--------------------|--------------------------|
| free CPO                                                      | 91.42±0.024        | 5.54±0.012               |
| SA-coated CPO@Ca <sub>3</sub> (PO <sub>4</sub> ) <sub>2</sub> | 90.64±0.036        | 6.18±0.007               |

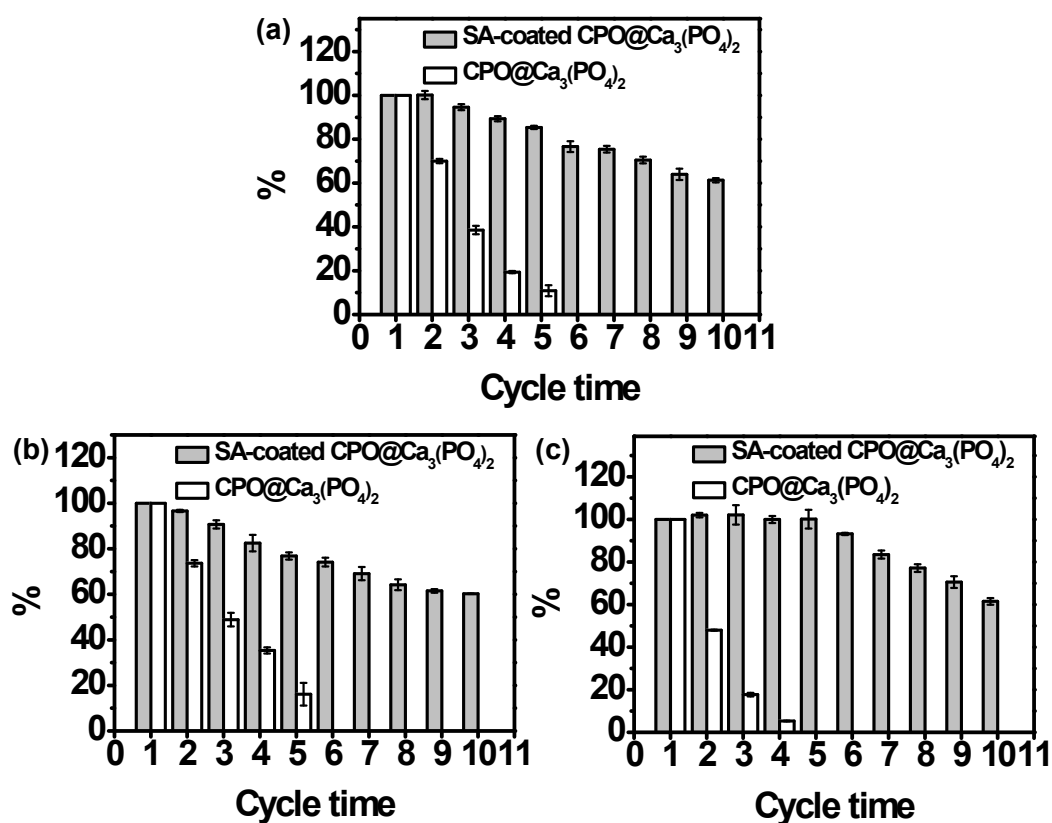

Fig. S6 The reusability of SA-coated CPO@Ca<sub>3</sub>(PO<sub>4</sub>)<sub>2</sub> and CPO@Ca<sub>3</sub>(PO<sub>4</sub>)<sub>2</sub> in different buffer solution. (a) citrate buffer; (b) acetate buffer; (c) citric acid-Na<sub>2</sub>HPO<sub>4</sub> buffer. CPO activities were measured as follows: Experiments were carried out at room temperature using 0.25 mM ABTS<sup>2-</sup> in 400  $\mu$ L of phosphoric acid buffer (pH 2.75, 10 mM) with 0.5 U CPO and 4.4 mM H<sub>2</sub>O<sub>2</sub>.

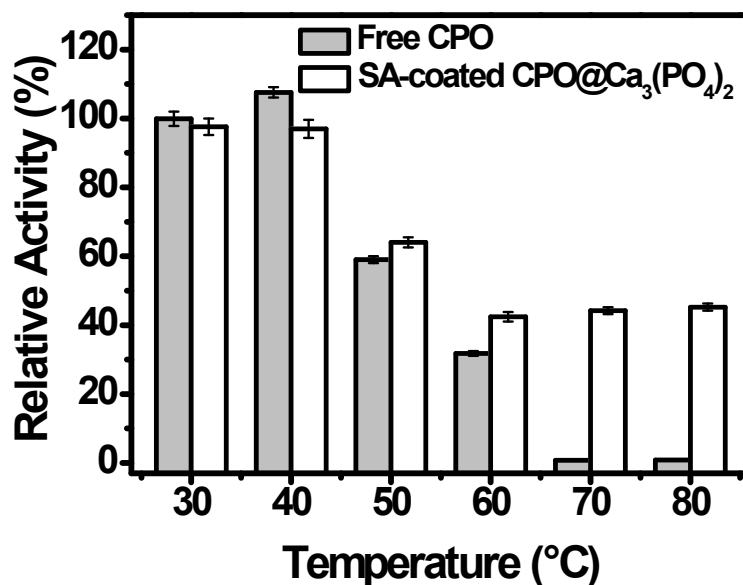

Fig. S7 Thermal stability of SA-coated CPO@Ca<sub>3</sub>(PO<sub>4</sub>)<sub>2</sub> and free CPO. The residual activity of the enzyme was measured as follow: 400  $\mu$ L of phosphoric acid buffer solution (pH 2.75, 10 mM) containing 0.5 U CPO and 0.25 mM ABTS<sup>2-</sup>, 4.4 mM H<sub>2</sub>O<sub>2</sub> followed by reaction for 10 min at room temperature.

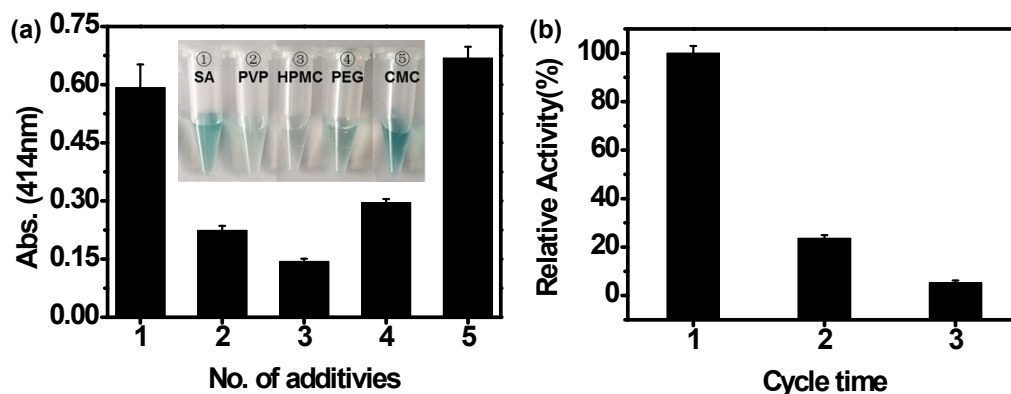

Fig. S8 (a) The enzyme activity with of different additives coating CPO@Ca<sub>3</sub>(PO<sub>4</sub>)<sub>2</sub>, inset: photographs showing visible detection; (b) The reusability of CMC-coated CPO@Ca<sub>3</sub>(PO<sub>4</sub>)<sub>2</sub>. (For the CPO activity assay, 400  $\mu$ L of phosphoric acid buffer solution (pH 2.75, 10 mM) containing 0.5 U CPO and 0.25 mM ABTS<sup>2-</sup>, 4.4 mM H<sub>2</sub>O<sub>2</sub> followed by reaction for 10 min at room temperature).

## Supplementary Reference

[S1] J. G. Xiaoling Wu, Cheng Yang, Miao Hou and Zheng Liu, *Chem. Commun.* **2015**, 51, 13408-13411.

[S2] M. M. Bradford, *Analytical Biochemistry* **1976**, 72, 248-254.
